# Supplementary material for: The AMPK activator R419 improves exercise capacity and skeletal muscle insulin sensitivity in obese mice
Source: PubMed Central journal article supplement — Mol Metab. 2015 Jun 15;4(9):643–51. doi: 10.1016/j.molmet.2015.06.002 (PMC4563030; doi:10.1016/j.molmet.2015.06.002), 2015-06-15
Supplement: mmc1.pdf [file mmc1.pdf]

**Supplementary Table 1: Hyperinsulinemic-euglycemic clamp serum analytes and parameters.**

|                                                  | AMPK-WT |      |    |                   |       |    | AMPK-MKO |                   |   |                    |      |   |
|--------------------------------------------------|---------|------|----|-------------------|-------|----|----------|-------------------|---|--------------------|------|---|
|                                                  | HFD     |      |    | HFD+R419          |       |    | HFD      |                   |   | HFD+R419           |      |   |
|                                                  | Average | ±SEM | N  | Average           | ±SEM  | N  | Average  | ±SEM              | N | Average            | ±SEM | N |
| <b>Basal State</b>                               |         |      |    |                   |       |    |          |                   |   |                    |      |   |
| <b>Blood Glucose (mmol/l)</b>                    | 11.7    | 0.8  | 10 | 10.3              | 0.7   | 11 | 10.2     | 0.4               | 6 | 10.5               | 0.8  | 8 |
| <b>HGP (mg kg<sup>-1</sup> min<sup>-1</sup>)</b> | 35.4    | 2.6  | 10 | 32.4              | 1.8   | 11 | 28.6     | 1.7               | 6 | 31.2               | 3.0  | 8 |
| <b>Clamped State</b>                             |         |      |    |                   |       |    |          |                   |   |                    |      |   |
| <b>HGP (mg kg<sup>-1</sup> min<sup>-1</sup>)</b> | 22.8    | 2.1  | 10 | 14.4 <sup>‡</sup> | 2.4   | 11 | 21.3     | 1.9               | 6 | 23.4               | 1.8  | 8 |
| <b>% Suppression (%)</b>                         | 32.1    | 7.8  | 10 | 51.3              | 8.4   | 11 | 24.2     | 8.2 <sup>§§</sup> | 6 | 20.0 <sup>§§</sup> | 6.6  | 8 |
| <b>Blood Glucose (mmol/l)</b>                    | 6.4     | 0.1  | 10 | 6.4               | 0.1   | 11 | 6.3      | 0.1               | 6 | 6.3                | 0.2  | 8 |
| <b>Steady State Insulin (ρmol/l)</b>             | 268.0   | 39.2 | 8  | 376.8             | 118.6 | 8  | 378.8    | 85.1              | 5 | 318.8              | 67.5 | 4 |
| <b>NEFA (mmol/l)</b>                             | 0.4     | 0.1  | 10 | 0.6               | 0.1   | 9  | 0.6      | 0.0               | 6 | 0.6                | 0.2  | 6 |
